# Supplementary material for: Pyruvate accumulation may contribute to acceleration-induced impairment of physical and cognitive abilities: an experimental study
Source: Oxford University Press journal article supplement (doi:10.1042/bsr20204284), 2021-03-30
Supplement: bsr-2020-4284_supp.pdf [file bsr-2020-4284_supp.pdf]

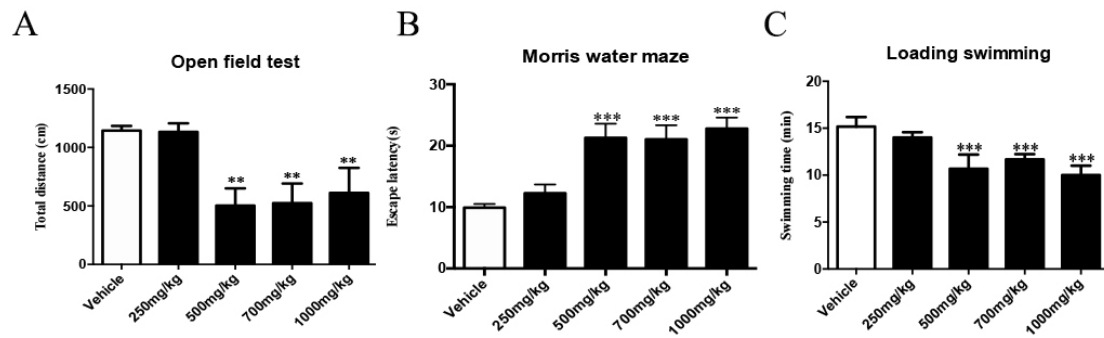

**Supplemental Fig. S1 The minimum dose of pyruvate administration to affect cognitive and physical functions. \* $p < 0.05$ , \*\* $p < 0.01$ , \*\*\* $p < 0.001$  vs Vehicle**

**Fig.S1A Changes of total distance traveled in different dose of pyruvate administration**

**Fig. S1B Changes of escape latency in different dose of pyruvate administration**

**Fig. S1C Changes of swimming time in different dose of pyruvate administration**
